# Supplementary material for: PARP-1 Regulates Metastatic Melanoma through Modulation of Vimentin-induced Malignant Transformation
Source: PubMed Central journal article supplement (PMC3681683; doi:10.1371/journal.pgen.1003531), 2013-06-13

Figure S5. Development of subcutaneous xenografts of melanoma is reduced by treatment with the PARP-1 inhibitor, DPQ

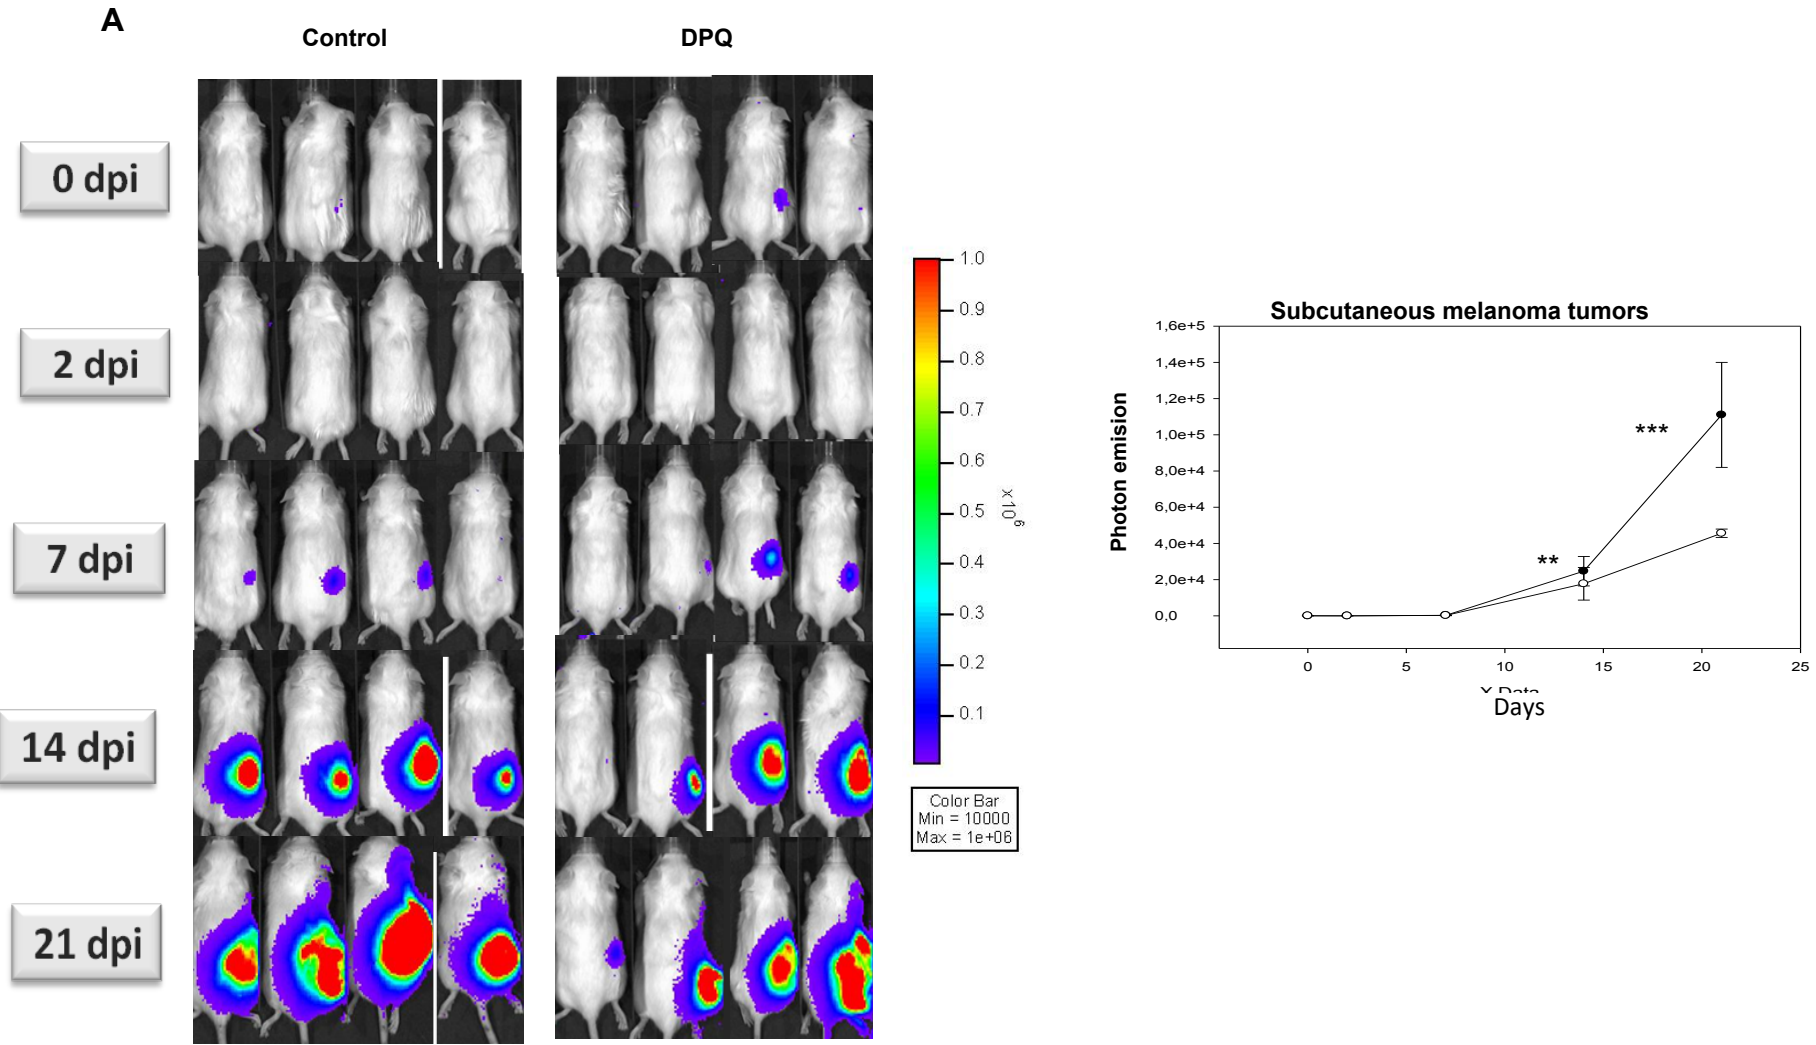

# Tissue metastasis as function of PARP inhibition

**B**

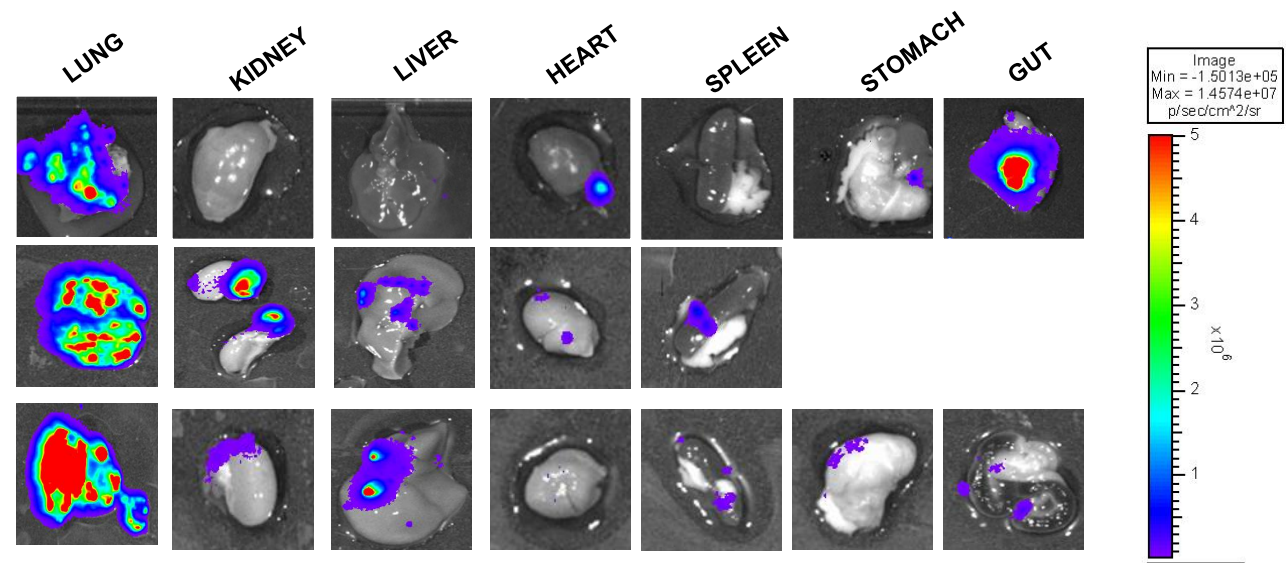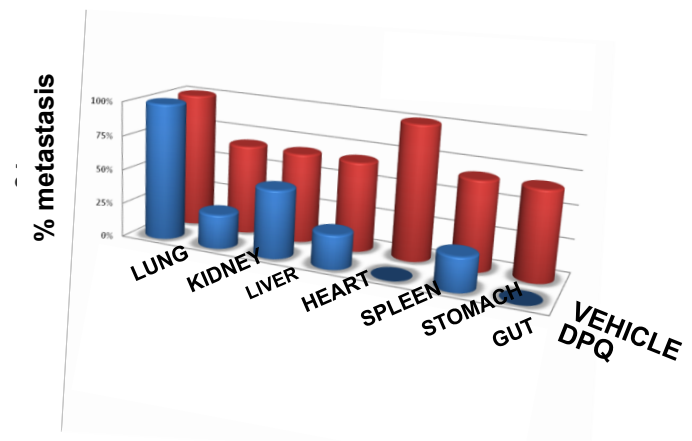

**Control**

**DPQ**

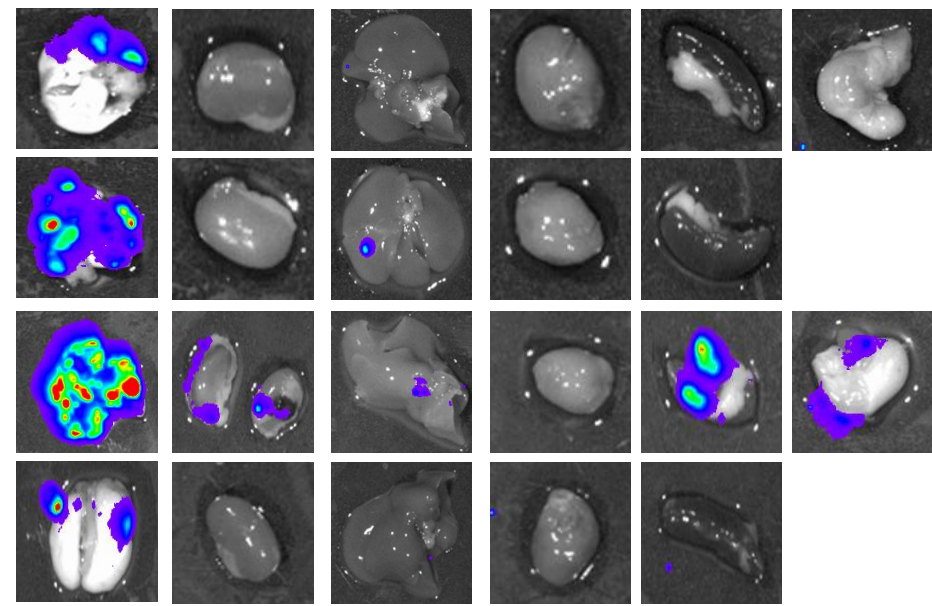

Supplement: pgen.1003531.s005.pdf [file pgen.1003531.s005.pdf]
