# Supplementary material for: PARP-1 Regulates Metastatic Melanoma through Modulation of Vimentin-induced Malignant Transformation
Source: PubMed Central journal article supplement (PMC3681683; doi:10.1371/journal.pgen.1003531), 2013-06-13
Supplement: pgen.1003531.s010.pdf [file pgen.1003531.s010.pdf]

**Table S2: Western Blot quantitation**

| <b>Figure 1B</b> | <b>Vimentin</b> | <b>Snail1</b> | <b>VE-cadherin</b> |
|------------------|-----------------|---------------|--------------------|
| Control          | 1               | 1             | 1                  |
| DPQ              | 0.25            | 0.26          | 1.4                |

  

| <b>Figure 2B</b> | <b>Vimentin</b> | <b>Snail1</b> | <b>E-cadherin</b> |
|------------------|-----------------|---------------|-------------------|
| Control          | 1               | 1             | 1                 |
| PJ-34            | 0.88            | 0.42          | 1.15              |

| <b>Figure 3A</b> | <b>PARP-1</b> | <b>Vimentin</b> | <b>AXL</b> | <b>E-cadherin</b> | <b>Snail1</b> | <b>ILK</b> | <b><math>\beta</math>-catenin</b> | <b>pGSK-3<math>\beta</math>/GSK-3<math>\beta</math></b> |
|------------------|---------------|-----------------|------------|-------------------|---------------|------------|-----------------------------------|---------------------------------------------------------|
| SCR              | 1             | 1               | 1          | 1                 | 1             | 1          | 1                                 | 1                                                       |
| iPARP-1          | 0.31          | 1               | 1.16       | 1.11              | 0.11          | 0.02       | 0.67                              | 0.76                                                    |
| iVimentin        | 0.11          | 0.12            | 0.09       | 1.23              | 0.95          | 0          | 0.81                              | 0.39                                                    |

  

| <b>Figure 3B</b> | <b>PARP-1</b> | <b>Vimentin</b> | <b>AXL</b> | <b>VE-cadherin</b> | <b>Snail1</b> | <b>ILK</b> | <b><math>\beta</math>-catenin</b> | <b>pGSK-3<math>\beta</math>/GSK-3<math>\beta</math></b> |
|------------------|---------------|-----------------|------------|--------------------|---------------|------------|-----------------------------------|---------------------------------------------------------|
| SCR              | 1             | 1               | 1          | 1                  | 1             | 1          | 1                                 | 1                                                       |
| iPARP-1          | 0             | 0.97            | 1.16       | 1.14               | 1.07          | 0.71       | 0.56                              | 0.93                                                    |
| iVimentin        | 1.71          | 0.08            | 0          | 1.35               | 0.47          | 0.17       | 0.38                              | 0.71                                                    |

| <b>Figure 4A</b> | <b>Vimentin</b> | <b>ILK</b> | <b>Snail1</b> | <b>E-cadherin</b> | <b><math>\beta</math>-catenin</b> | <b>pGSK-3<math>\beta</math>/GSK-3<math>\beta</math></b> |
|------------------|-----------------|------------|---------------|-------------------|-----------------------------------|---------------------------------------------------------|
| GFP              | 1               | 1          | 1             | 1                 | 1                                 | 1                                                       |
| GFP-vimentin     | 1.39            | 1.6        | 1.6           | 0.97              | 1.27                              | 1.7                                                     |

  

| <b>Figure 4B</b>    | <b>Vimentin</b> | <b>ILK</b> | <b>Snail1</b> | <b>E-cadherin</b> | <b><math>\beta</math>-catenin</b> | <b>pGSK-3<math>\beta</math>/GSK-3<math>\beta</math></b> |
|---------------------|-----------------|------------|---------------|-------------------|-----------------------------------|---------------------------------------------------------|
| GFP                 | 1               | 1          | 1             | 1                 | 1                                 | 1                                                       |
| GFP + LiCl          | 0               | 1.48       | 1.15          | 0.98              | 0.67                              | 1.22                                                    |
| GFP-vimentin        | 1               | 1          | 1             | 1                 | 1                                 | 1                                                       |
| GFP-vimentin + LiCl | 2.65            | 0.99       | 1.28          | 0.9               | 2.21                              | 1.07                                                    |

  

| <b>Figure 4C</b>    | <b>Vimentin</b> | <b>ILK</b> | <b>Snail1</b> | <b>E-cadherin</b> | <b><math>\beta</math>-catenin</b> | <b>pGSK-3<math>\beta</math>/GSK-3<math>\beta</math></b> |
|---------------------|-----------------|------------|---------------|-------------------|-----------------------------------|---------------------------------------------------------|
| GFP + SCR           | 1               | 1          | 1             | 1                 | 1                                 | 1                                                       |
| GFP + iILK          | 0               | 0.83       | 0             | 1.66              | 0.59                              | 0.46                                                    |
| GFP-vimentin + SCR  | 1               | 1          | 1             | 1                 | 1                                 | 1                                                       |
| GFP-vimentin + iILK | 2.31            | 0.89       | 1             | 0.64              | 1.4                               | 1.68                                                    |

| <b>Figure 5A</b> | <b>pVE-cadherin</b> | <b>VE-cadherin</b> |
|------------------|---------------------|--------------------|
| Control          | 1                   | 1                  |
| PJ-34            | 0.86                | 0.8                |
| KU0058948        | 0.8                 | 0.25               |

| <b>Figure S3B</b> | <b>Vimentin</b> | <b>Snail1</b> | <b>E-cadherin</b> |
|-------------------|-----------------|---------------|-------------------|
| Control           | 1               | 1             | 1                 |
| PJ-34             | 0.9             | 0.48          | 1.2               |
| Control           | 1               | 1             |                   |
| KU0058948         | 0.83            | 0.85          |                   |
